# Supplementary material for: Alkali metal-doped two-dimensional Janus Cr2Br3I3 monolayers with the quantum anomalous Hall effect
Source: Royal Society of Chemistry journal article supplement (doi:10.1039/d4tc00088a), 2024-01-01
Supplement: d4tc00088a1.pdf [file d4tc00088a1.pdf]

### Supplementary Material

Alkali metal doped two dimensional Janus  $\text{Cr}_2\text{Br}_3\text{I}_3$  monolayers with quantum anomalous Hall effect

Xiang Yin<sup>a</sup>, Li Deng<sup>a</sup>, Yanzhao Wu<sup>a</sup>, Junwei Tong<sup>b</sup>, Feifei Luo<sup>a</sup>, Fubo Tian<sup>c</sup>, and Xianmin Zhang<sup>a\*</sup>

<sup>a</sup>Key Laboratory for Anisotropy and Texture of Materials (Ministry of Education), School of Material Science and Engineering, Northeastern University, Shenyang, 110819, China

<sup>b</sup>Department of Physics, Freie Universität Berlin, Berlin, 14195, Germany

<sup>c</sup>State Key Laboratory of Superhard Materials, College of Physics, Jilin University, Changchun, 130012, China

\*E-mail: [zhangxm@atm.neu.edu.cn](mailto:zhangxm@atm.neu.edu.cn)

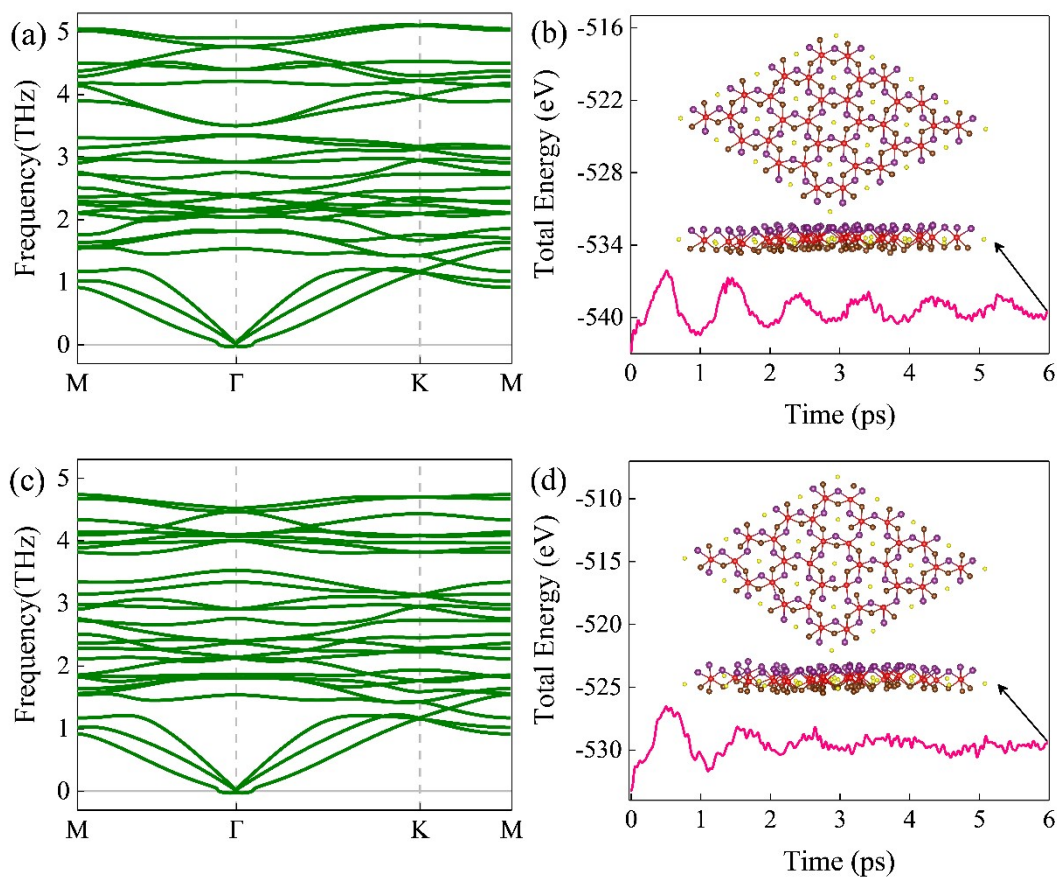

**Fig. S1** The phonon dispersion spectra of the (a) Li- and (c) K doped ML  $\text{Cr}_2\text{Br}_3\text{I}_3$ . Total energy fluctuation at AIMD simulations of the (b) Li- and (d) K doped ML  $\text{Cr}_2\text{Br}_3\text{I}_3$ . The insets in (b) and (d) shows snapshots of the Li- and K doped ML  $\text{Cr}_2\text{Br}_3\text{I}_3$  at 6 ps.

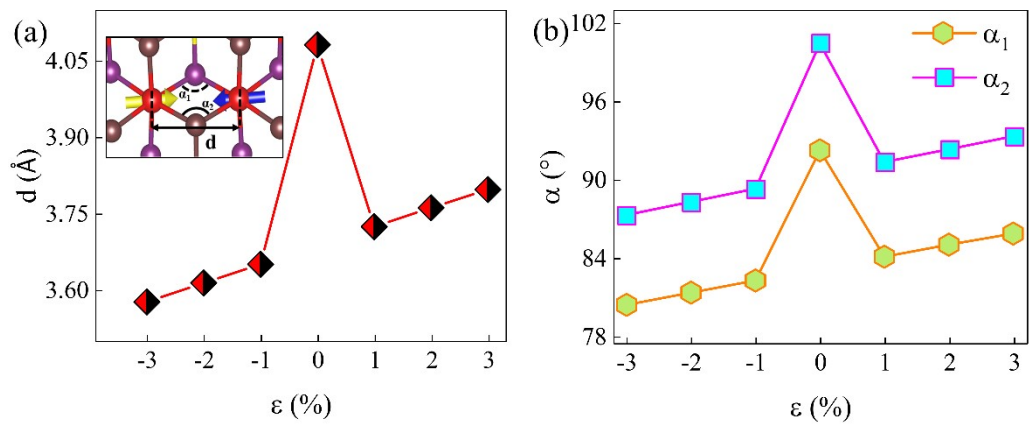

**Fig. S2** (a) The strain dependence of the distance between two Cr atoms. (b) The strain dependences of  $\alpha_1$  angle for Cr-I-Cr and  $\alpha_2$  angle for Cr-Br-Cr. The insert shows the  $d$ ,  $\alpha_1$ , and  $\alpha_2$ .

The strain dependence of the distance ( $d$ ) between two Cr atoms is drawn in Fig. S2(a). The  $d$  significantly enlarges when  $\epsilon$  is from -1% to 0%. As shown in Fig. S2(b), both the angles of  $\alpha_1$  and  $\alpha_2$  also suddenly increase from -1% to 0%. The results clearly prove the enhancement of FM superexchange interaction. Therefore, the change of  $d$ ,  $\alpha_1$ , and  $\alpha_2$  under various strains likely induces a sharp change of energy difference at  $\epsilon = 0$  through affecting the magnetic interactions in Figs. 2(a) through 2(c).

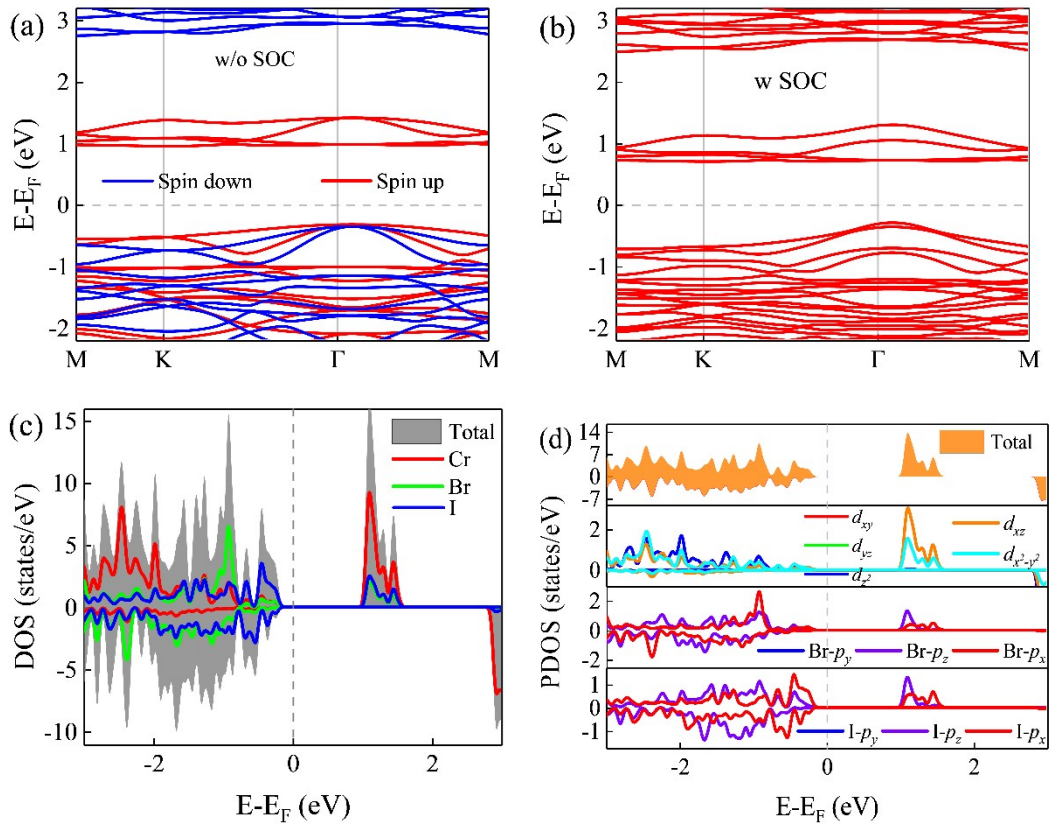

**Fig. S3** Band structures of pristine ML  $\text{Cr}_2\text{Br}_3\text{I}_3$ . (a) without SOC. (b) with SOC. Density of states (DOS) and Projected density of states (PDOS) of pristine ML  $\text{Cr}_2\text{Br}_3\text{I}_3$ .

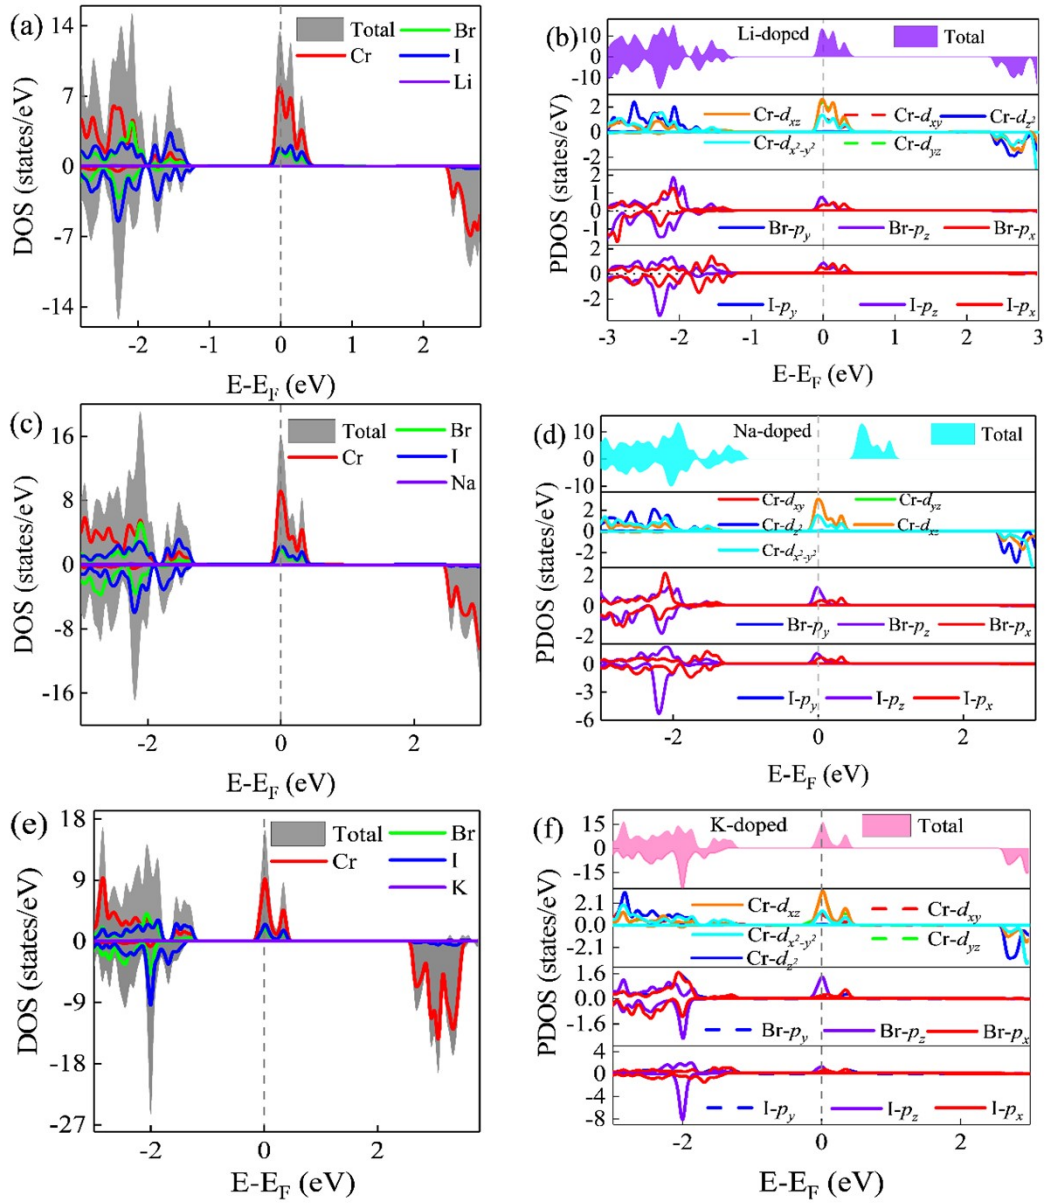

**Fig. S4** DOS of (a) Li doped, (c) Na doped, and (e) K doped ML  $\text{Cr}_2\text{Br}_3\text{I}_3$ . PDOS of (b) Li doped, (d) Na doped, and (f) K doped ML  $\text{Cr}_2\text{Br}_3\text{I}_3$ .

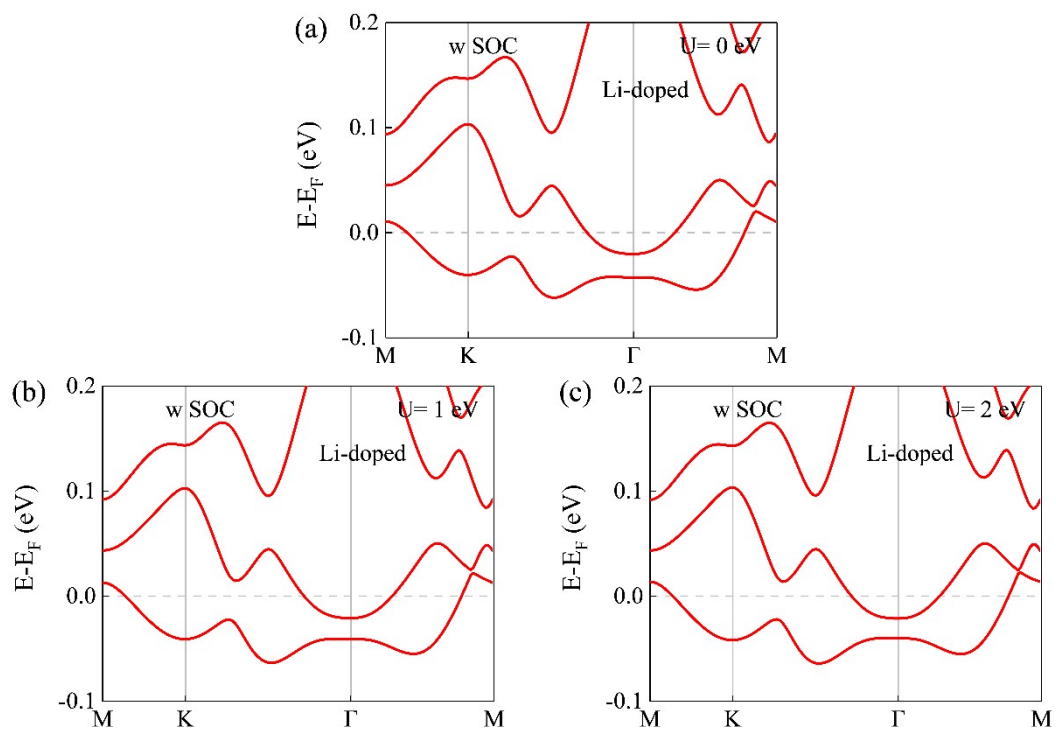

**Fig. S5** Band structures of Li doped ML  $\text{Cr}_2\text{Br}_3\text{I}_3$  with SOC at different  $U$  values. (a)  $U = 0$  eV. (b)  $U = 1$  eV. (c)  $U = 2$  eV.
